# Supplementary material for: Direct synthesis of Fmoc-protected amino acids using organozinc chemistry: application to polymethoxylated phenylalanines and 4-oxoamino acids†
Source: Royal Society of Chemistry journal article supplement (doi:10.1039/b103832j), 2001-01-01
Supplement: b103832j.doc [file b103832j.doc]

# Supplementary data

**Direct Synthesis of Fmoc-protected Amino Acids using Organozinc Chemistry: Application to Polymethoxylated Phenylalanines and 4-Oxo Amino Acids**

**Hervé J. C. Deboves,a Christian A. G. N. Montalbettia and Richard F. W. Jackson*b**

**aDepartment of Chemistry, Bedson Building, The University of Newcastle,**

**Newcastle upon Tyne, NE1 7RU, UK.**

**bDepartment of Chemistry, Dainton Building,**

**The University of Sheffield, Sheffield, S3 7HF, UK.**

**Supplementary material**

**Preparation of Iodoaromatics**

***Synthesis of 3-Iodobenzophenone1, 2***

3-Iodobenzoic acid (3.25 g, 13.1 mmol) was dissolved in chloroform (15 ml). Thionyl chloride (5 ml,68.5 mmol, 5.2 eq) was added slowly giving a "milky" solution which was heated at 60°C for two hours. A clear dark orange solution was obtained. Chloroform and thionyl chloride were evaporated, then benzene (25 ml) was added. The reaction mixture was placed in an ice bath and AlCl3 (2.0 g, 15 mmol, 1.1 eq) was added in small portions. The reaction mixture was heated at 45-50°C overnight. The solvent was removed and the residue was distilled on a Kugelrohr apparatus to yield an oil which solidified on standing. The solid was recrystallised form petroleum ether to yield 3-Iodobenzophenone (2.85 g, 71%) as colourless shiny plates. mp. 41-43C (Found *M+* 307.9700; C13H9OI requires 307.9698). Found (C, 50.9; H, 2.8%: C13H9OI requires C, 50.7; H, 2.9 %); νmax (KBr Disc)/cm-1 3054 (m), 3011 (m), 1659 (s), 1063 (m), 811 (w), and 713 (s); H (CDCl3) 7.22 (1H, t, *J* 7.5, Ar*H*), 7.49 (2H, dt, *J* 2.0, 7.5, Ar*H*), 7.61 (1H, tt, *J* 2.0, 7.5, Ar*H*), 7.73 (1H, dt, *J* 2.0, 7.5, Ar*H*), 7.78 (2H, dd, *J*, 2.0, 7.5, Ar*H*), 7.91 (1H, ddd, *J* 1.0, 2.0, 7.5, Ar*H*), 8.13 (1H, t, *J*, 2.0, Ar*H*). C (CDCl3) 94.03 (Ar-I), 128.43 (Ar), 129.10 (Ar), 129.93 (Ar), 130.00 (Ar), 132.81 (Ar), 136.87 (Ar), 138.58 (Ar), 139.48 (Ar), 141.13 (Ar), 195.01 (C=O); *m/z* (EI) M+ 308 (100), 203 (15), 152 (8), 105 (97), 77 (41).

**General Synthesis for aryl iodides A, B and C3**

A suspension of the appropriate methoxybenzene derivative (5 mmol,), HgO (red, 1.083 g, 5 mmol, 1 eq) and I2 (1.270 g, 5 mmol, 1 eq) in dichloromethane (10 ml) was stirred at room temperature for 45 min. The solution was filtered to remove precipitates. The filtrate was washed with Na2SO3 1M (2x20 ml), dried and evaporated. The residue was distilled on a Kugelrohr apparatus or recrystallised to yield the desired iodide.

2,3,4-Trimethoxy-iodobenzene (A)

Following the general procedure for the synthesis of aryl iodide described previously, 2,3,4-trimethoxyiodobenzene (1.16 g, 79%) was obtained as a yellow oil which solidified on standing and was recrystallised from petroleum ether. mp. 38-40C (Found *M+* 293.9755; C9H11O3I requires 293.9753). Found (C, 37.0; H, 3.6 %: C9H11O3I requires C, 36.8; H, 3.7 %); νmax (KBr Disc)/cm-1 3082 (m), 3011 (m), 2998 (s), 2903 (s), 2870 (s), 2836 (s), 1220 (s), 1090 (s) and 835 (s); H (CDCl3) 3.76 (3H, s, OC*H*3), 3.80 (3H, s, OC*H*3), 3.81 (3H, s, OC*H*3), 6.42 (1H, d, *J* 8.8, C(5)*H*), 7.34 (1H, d, *J* 8.9, C(6)*H*). C (CDCl3) 56.01 (OCH3), 60.70 (OCH3), 60.82 (OCH3), 81.15 (C(1)), 109.61 (C(5)), 132.39 (C(3)), 142.54 (C(6)), 153.20 (C(4)), 154.24 (C(2)), *m/z* (EI) M+ 294 (100), 279 (22), 152 (7), 137 (9).

2,4-Dimethoxy-iodobenzene (B)

Following the general procedure for the synthesis of aryl iodide described previously, *2,4-*dimethoxy-iodobenzene (1.06 g, 80%) was obtained as a clear oil which solidified on standing and was recrystallised from petroleum ether. mp. 39-40C (Lit. 40-41C3). Found (C, 36.5; H, 3.3 %: C8H9O2I requires C, 36.4; H, 3.4 %); νmax (KBr Disc)/cm-1 3084 (m), 2938 (m), 2998 (s), 2834 (s), 2870 (s),1210 (s), 1056 (s) 831 (m) and 822 (w); H (CDCl3) 3.80 (3H, s, OC*H*3), 3.85 (3H, s, OC*H*3), 6.32 (1H, dd, *J* 2.5, 8.5, C(5)*H*), 6.43 (1H, d, *J* 2.5, C(3)*H*), 6.43 (1H, d, *J* 8.5, C(6)*H*). C (CDCl3) 55.61 (OCH3), 56.337 (OCH3), 74.87 (C(1)), 99.35 (C(3)), 107.07 (C(5)), 139.28 (C(6)), 158.98 (C(4)), 161.48 (C(2)); *m/z* (EI) M+ 264 (100), 122 (10).

3,4-Dimethoxy-iodobenzene (C)

Following the general procedure for the synthesis of aryl iodide described previously, 3,4-dimethoxyiodobenzene (1.10 g, 83%) was obtained as white solid which was recrystallised from petroleum ether to give colourless needles. mp. 32-34C (Lit. 33-34C3). . (Found *M+* 263.9651; C8H9O2I requires 263.9647); Found (C, 36.5; H, 3.3 %: C8H9O2I requires C, 36.4; H, 3.4 %); νmax (KBr Disc)/cm-1 3076 (m), 2954 (m), 2836 (m), 1228 (s), 1022 (s), and 838 (m); H (CDCl3) 3.85 (3H, s, OC*H*3), 3.86 (3H, s, OC*H*3), 6.62 (1H, d, *J* 8.5, C(5)*H*), 7.12 (1H, d, *J* 1.8, C(2)*H*), 7.22 (1H, dd, *J* 1.8, 8.5, C(6)*H*). C (CDCl3) 55.91 (OCH3), 56.07 (OCH3), 82.31 (C(1)), 113.16 (C(5)), 120.33 (C(6)), 129.74 (C(2)), 149.15 (C(4)), 149.81 (C(3)); *m/z* (EI) M+ 264 (100), 249 (28), 136 (7).

***3,4,5-Trimethoxy-iodobenzene4***

Sodium nitrite (6.9 g, 100 mmol, 10 eq) in water (10 ml) was added dropwise to a stirred, ice cooled, solution of 3,4,5-trimethoxyaniline (1.83 g, 10 mmol) in water (10 ml) and conc. H2SO4 (1.6 ml, 30 mmol, 3 eq). The reaction was stirred until all starting substituted aniline had disappeared. The yellow solution was then poured into a stirred solution of KI (2.5 g, 15 mmol, 1.5 eq) in water (5 ml). Reaction mixture was extracted with diethyl ether (3x30 ml). The combined organic phases were washed with aqueous Na2SO3 1M (30 ml), water (30 ml), brine (30 ml), dried and evaporated. The obtain solid was recrystallised from ethanol to give 3,4,5-trimethoxy-iodobenzene (2.12 g, 72%) as colourless plate crystals . mp. 84-86C (Lit. 85-87C4). (Found *M+* 293.9749; C9H11O3I requires 293.9753);Found (C, 37.0; H, 3.5 %: C9H11O3I requires C, 36.8; H, 3.8 %); νmax (KBr Disc)/cm-1 3099 (m), 2935 (m), 2857 (m), 2836 (m), 1231 (s), 1126 (s), and 811 (s); H (CDCl3) 3.82 (3H, s, OC*H*3), 3.84 (6H, s, OC*H*3), 6.89 (2H, s, C(2)*H* and C(6)*H);* C(CDCl3) 56.27 (OCH3), 60.80 (OCH3), 86.06 (C(1)), 114.96 (C(2)), 138.25 (C(4)), 153.94 (C(3)); *m/z* (EI) M+ 294 (100), 279 (52), 251 (15), 236 (12), 221 (7).

***3,5-Dimethoxyiodobenzene5***

In a 100 ml, 3-necked, round-bottomed flask equipped with a thermometer, a mechanical stirrer, and an addition funnel, was placed HCl (12 M, 20 ml, 0.24 mol) and crushed ice (20g). The flask was immersed in an ice-acetone cooling bath, and 3,5-dimethoxyaniline (5g, 32.6 mmol) was added portion wise with stirring. To this cold suspension was added dropwise a solution of NaNO2 (2.7g, 39 mmol), in 12.5 ml of water at such a rate as to maintain the temperature of the reaction mixture between –5 and +2°C throughout the addition and the solution stirred at 0°C for 30 min. The resulting dark solution of the diazonium salt was added in a rapid dropwise fashion to a well-stirred room temperature solution of KI (55g, 0.33mmol) in water 75 ml. The mixture was stirred for 1 h, and then allowed to stand overnight. The resulting solution was partitioned against a 1:1 mixture of Et2O-petrol (2 x 70 ml), then Et2O. The pooled organic extracts were washed with water (2 x 70 ml), aq. sat. Na2SO3 solution (50 ml), dried over Na2SO4 and evaporated. The residue was filtered through a pad of silica gel and eluted with 5% EtOAc in petrol to give 3,5-dimethoxyiodobenzene (3.20 g, 38%) as a white powder. mp. 68-69C. (Found *M+* 263.9635; C8H9O2I requires 263.9647); Found (C, 36.3; H, 3.3 %: C8H9O2I requires C, 36.4; H, 3.4 %); νmax (KBr Disc)/cm-1 3068 (m), 2929 (m), 2833 (m), 1197 (m), 1031 (s), 854 (s) and 820 (s); H (CDCl3) 3.76 (6H, s, OC*H*3), 6.40 (1H, d, *J* 2.4, C(4)*H),* 6.85 (2H, d, *J* 2.4, C(2)*H* and C(4)*H);* C(CDCl3) 55.48 (OCH3), 94.07 (C(1)), 100.66 (C(4)), 115.79 (C(2)), 161.06 (C(3)); *m/z* (EI) M+ 264 (100), 137 (10), 122 (25).

**References**

1 G. Olah, Q. Wang, G. Sandford, and G. Surya Prakash, *J. Org. Chem.*, 1993, **58**, 3194.

2 P. J. Montagne, *Rec. Trav. Chim.*, 1920, 350.

3 K. Orito, T. Hatekeyama, M. Takeo, and H. Suginome, *Synthesis*, 1995, 1273.

4 H. Erdtman, G. Eriksson, T. Norin, and S. Forsen, *Acta Chem. Scand.*, 1963, **17**, 1151.

5 M. R. Pavia, M. P. Cohen, G. J. Dilley, G. R. Dubuc, T. L. Durgin, F. W. Forman, M. E. Hediger, G. Milot, T. S. Powers, I. Sucholeiki, S. L. Zhou, and D. G. Hangauer, *Bioorg. Med. Chem.*, 1996, **4**, 659.
